# Supplementary material for: Effectiveness of a culturally tailored diabetes education curriculum with real-time continuous glucose monitoring in a Latinx population with type 2 diabetes: the CUT-DM with CGM for Latinx randomised controlled trial study protocol
Source: PubMed Central journal article supplement — BMJ Open. 2023 Dec 28;13(12):e082005. doi: 10.1136/bmjopen-2023-082005 (PMC10759074; doi:10.1136/bmjopen-2023-082005), 2023-12-28
Supplement: bmjopen-2023-082005.reviewer_comments.pdf [file bmjopen-2023-082005.reviewer_comments.pdf]

## PEER REVIEW HISTORY

BMJ Open publishes all reviews undertaken for accepted manuscripts. Reviewers are asked to complete a checklist review form (<http://bmjopen.bmj.com/site/about/resources/checklist.pdf>) and are provided with free text boxes to elaborate on their assessment. These free text comments are reproduced below.

## ARTICLE DETAILS

|                            |                                                                                                                                                                                                                                            |
|----------------------------|--------------------------------------------------------------------------------------------------------------------------------------------------------------------------------------------------------------------------------------------|
| <b>TITLE (PROVISIONAL)</b> | Effectiveness of a culturally tailored diabetes education curriculum with real-time continuous glucose monitoring in a Latinx population with type 2 diabetes: The CUT- DM with CGM for Latinx randomized controlled trial study protocol. |
| <b>AUTHORS</b>             | Ehrhardt, Nicole; Cedeno, Brian; Montour, Laura; Sinclair, Ka'imi; Ferguson, Gary; Berberian, Peter; Comstock, Bryan; Wright, Lorena                                                                                                       |

This article was not externally reviewed at BMJ Open. Protocols that have been independently assessed prior to submission to BMJ Open are usually fast-tracked to publication on the grounds that further substantial changes will not be possible. This independent assessment will usually be external, independent review for both a substantial grant award from a non-commercial or government funder and ethics approval.
