# Supplementary material for: Effectiveness of a culturally tailored diabetes education curriculum with real-time continuous glucose monitoring in a Latinx population with type 2 diabetes: the CUT-DM with CGM for Latinx randomised controlled trial study protocol
Source: PubMed Central journal article supplement — BMJ Open. 2023 Dec 28;13(12):e082005. doi: 10.1136/bmjopen-2023-082005 (PMC10759074; doi:10.1136/bmjopen-2023-082005), 2023-12-28
Supplement: bmjopen-2023-082005supp001.pdf [file bmjopen-2023-082005supp001.pdf]

IDENTIFICACIÓN: \_\_\_\_\_

Visita: \_\_\_\_\_

Fecha: \_\_\_\_\_

**Cambios en el estilo de vida con el monitoreo continuo de glucosa (MCG) Diabetes**

Para cada pregunta, marque la opción que mejor describa su experiencia con el Monitoreo Continuo de Glucosa (MCG).

1. Después de la monitorización continua de glucosa  
Sientes que:

- limitaste bebidas azucaradas
- excluiste bebidas azucaradas
- no hiciste cambios con respecto a bebidas azucaradas
- nunca bebiste bebidas azucaradas antes del uso del MCG

2. Después del uso del Monitoreo Continuo de Glucosa:  
Sientes que:

- limitaste el arroz blanco
- excluiste el arroz blanco
- no hiciste cambios con el arroz blanco
- nunca comiste arroz blanco antes del uso del MCG

3. Después del uso del Monitoreo Continuo de Glucosa:  
Sientes que:

- limitaste los cereales
- excluiste los cereales
- no hiciste cambios con los cereales
- nunca comiste cereales antes del uso de MCG

4. Después del uso de Monitoreo Continuo de Glucosa:  
Sientes que lees las etiquetas para el contenido de fibra:

- si
- no
- leía las etiquetas para fibra antes del uso del MCG

5. ¿Hay algún alimento que limitó o excluyó después del uso continuo del monitor de glucosa? Enumere los tres principales o diga "ninguno".

---

---

---

---

6. ¿Piensa que el uso del Monitor Continuo de Glucosa lo hizo más propenso a ser más activo/a aumentar su ejercicio?

- Si
- No
- Ya era muy activo/a
- No se

7. ¿Era más probable que saliera a caminar o hiciera actividad física después de una comida si observaba un aumento de azúcar en la sangre en su Monitor Continuo de Glucosa?

- Si
- No
- Ya salía a caminar o era activo después de las comidas
- No se

8- Piensa que está tomando su medicina mas regularmente como resultado de su participación en nuestras sesiones educativas?

- Si
- No
- No lo sé

9. En general, ¿piensa que el Monitoreo Continuo de Glucosa contribuyó a cambios para lograr un estilo de vida "más saludable"?

- Si
- No
- No Se

10. ¿Algo más que quieras contarnos sobre tu experiencia con el Monitoreo Continuo de Glucosa?

---

---

---

---
