# Supplementary material for: Effectiveness of a culturally tailored diabetes education curriculum with real-time continuous glucose monitoring in a Latinx population with type 2 diabetes: the CUT-DM with CGM for Latinx randomised controlled trial study protocol
Source: PubMed Central journal article supplement — BMJ Open. 2023 Dec 28;13(12):e082005. doi: 10.1136/bmjopen-2023-082005 (PMC10759074; doi:10.1136/bmjopen-2023-082005), 2023-12-28
Supplement: bmjopen-2023-082005supp002.pdf [file bmjopen-2023-082005supp002.pdf]

# Monitoreo continuo de glucosa en tiempo real (RT-CGM) para diabetes

## Paquete para participantes

¡Tome el control de su salud!

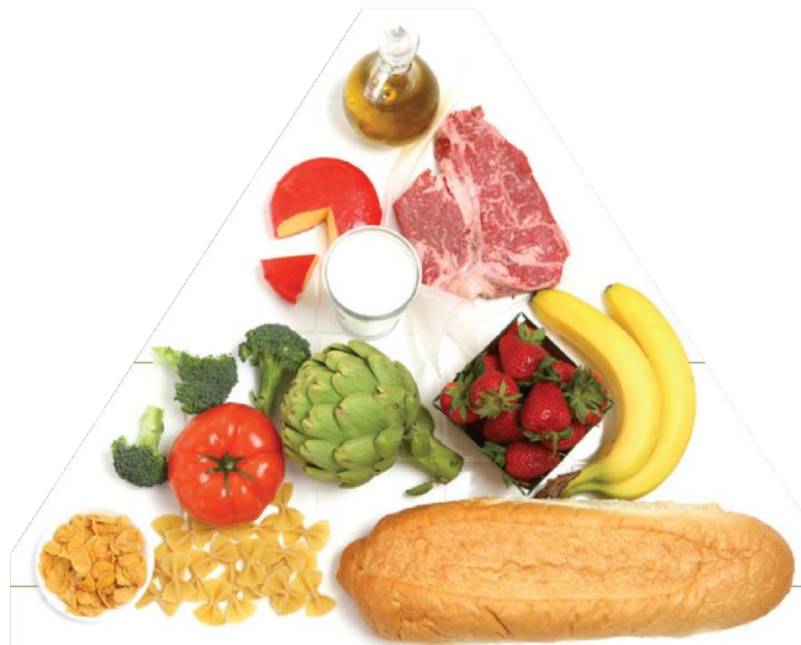

## 1. Dispositivo CGM de Dexcom:

El dispositivo de monitoreo continuo de glucosa (CGM) de Dexcom se inserta en la piel a nivel del estómago. Usted puede continuar con todas sus actividades diarias, incluso bañarse y nadar, mientras lo usa.

## 2. Comida:

En el registro proporcionado, registre cada comida y colación que coma, incluyendo la cantidad. Por ejemplo, si come pasta, registre “2 tazas de pasta” en lugar de solo “pasta”, o si comió queso, registre “3 oz de queso” en lugar de simplemente “queso”.

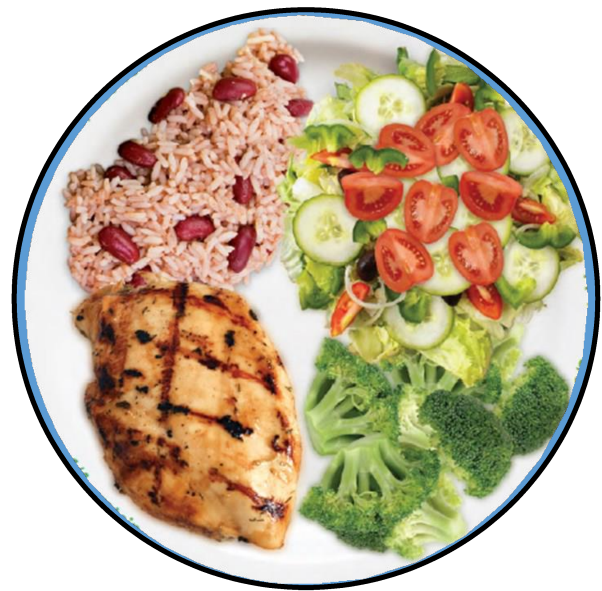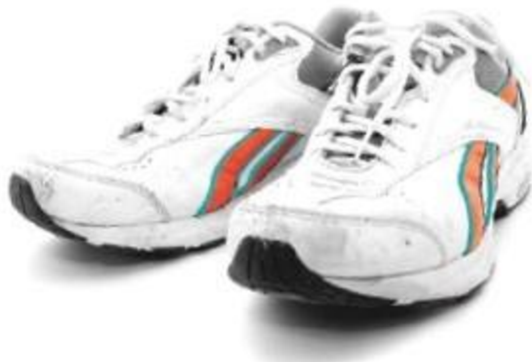

## 3- Actividad Física:

Registre la actividad física en el registro proporcionado. Por ejemplo, si va a caminar, registre: “20 minutos caminando a paso ligero” o si sube las escaleras, registre: “subí 3 pisos de escaleras”.

## **Monitoree su salud usando un CGM en Tiempo Real.**

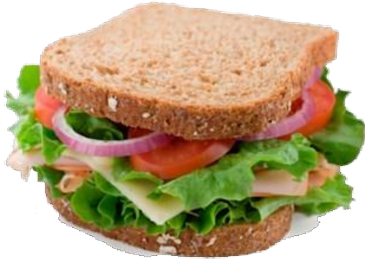

1. Si lo desea, continúe registrando cada comida y colación que come, incluyendo la cantidad.

2. Registre la actividad física.

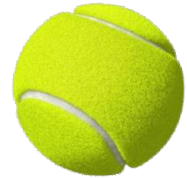

3. Registre su nivel de glucosa antes de cada comida y, 1 y 2 horas después de cada comida o colación (observe el MGC para su nivel de glucosa en sangre en tiempo real).

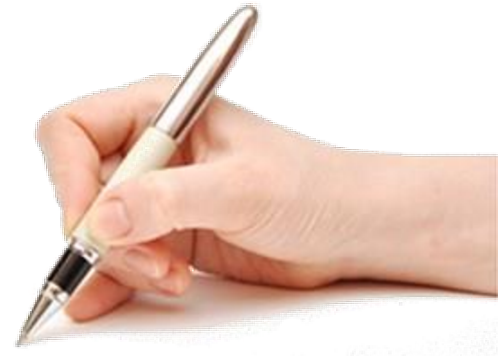

### **Objetivos de glucosa en sangre**

**Glucosa antes de las comidas: 80 to 110 mg/dL**

**1 hora después de comer: menos de 160 mg/dL**

**2 horas después de comer: menos de 140 mg/dL**

American Association of Clinical Endocrinologists, 2018

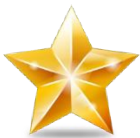

**NO se desanime si sus valores son más altos al principio. Piense en lo que puede estar causando esos valores más altos. ¡Haz cambios para ver si puedes bajar esos números!**

¡Con el sistema Dexcom RT-CGM podrá ver sus valores de glucosa en tiempo real!

## Uso del sistema de monitorización continua de glucosa (CGM) de Dexcom:

- 1- Usted recibirá lecturas en la aplicación Dexcom G6 en su teléfono inteligente o en el receptor de Dexcom. Dexcom actualiza la lectura de glucosa cada cinco minutos.
- 2- Si la lectura en su dispositivo no coincide con cómo se siente, debe verificar su glucosa con su medidor.
- 3- Junto con el valor actual de su glucosa, Dexcom mostrará flechas de tendencia. Las flechas le indican si su nivel de glucosa es estable, si se dirige hacia arriba o hacia abajo y con qué rapidez.

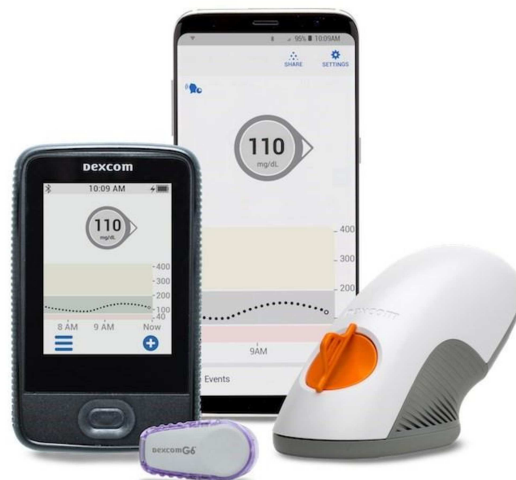

|                                                                                                                                                                                                               |                                                                                                                                                                                                             |
|---------------------------------------------------------------------------------------------------------------------------------------------------------------------------------------------------------------|-------------------------------------------------------------------------------------------------------------------------------------------------------------------------------------------------------------|
| <p>¿Qué significan las flechas?</p>                                                                                                                                                                           |  <p>La glucosa es estable.<br/>No cambia más de 1 mg/dL por minuto.</p>                                                  |
|  <p>La glucosa está cayendo lentamente.<br/>La glucosa podría disminuir de 30 a 60 mg/dL en los próximos 30 minutos.</p>   |  <p>Glucosa está subiendo lentamente.<br/>La glucosa podría aumentar de 30 a 60 mg/dL en los próximos 30 minutos.</p>    |
|  <p>La Glucosa está cayendo moderadamente<br/>La glucosa podría disminuir de 60 a 90 mg/dL en los próximos 30 minutos.</p> |  <p>Glucosa está subiendo moderadamente.<br/>La glucosa podría aumentar de 60 a 90 mg/dL en los próximos 30 minutos.</p> |
|  <p>La glucosa está cayendo rápidamente.<br/>La glucosa podría disminuir más de 90 mg/dL en los próximos 30 minutos.</p>   |  <p>Glucosa está subiendo rápidamente.<br/>La glucosa podría aumentar más de 90 mg/dL en los próximos 30 minutos.</p>    |



## ¿Qué cosas afectan la glucosa?

Muchas cosas pueden hacer que su nivel de glucosa suba o baje. Los alimentos pueden afectar su glucosa. Ciertos tipos de alimentos pueden elevar su nivel de glucosa más rápido y alto que otros.

| Effect of FOOD on Glucose        |
|----------------------------------|
| ↑ Carbohidratos                  |
| ↑ Grasa                          |
| → Proteína                       |
| ↓ ↑ Alcohol                      |
| → ningún efecto sobre la glucosa |
| ↑ eleva la glucosa               |
| ↓ reduce la glucosa              |

### Carbohidratos

1. Los carbohidratos incluyen azúcares y almidones. Los azúcares se encuentran en alimentos como postres, frutas y algunos lácteos. Los almidones incluyen alimentos elaborados con granos (pan, cereal, arroz, etc.) y algunas verduras con almidón como guisantes, papas y frijoles. Los carbohidratos pueden incluirse en una dieta saludable. ¡Pero la CALIDAD y la CANTIDAD son importantes!

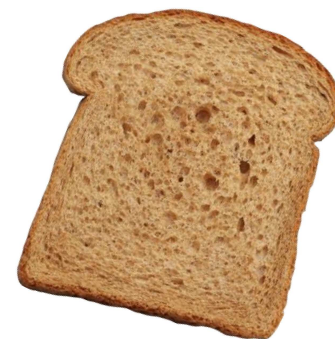

2. Los carbohidratos con fibra tienden a ser de mejor calidad que los que no tienen fibra. Revise las etiquetas de sus alimentos cuando elija sus carbohidratos y trate de comer alimentos con al menos 3 gramos de fibra por porción.

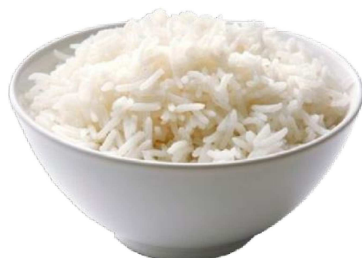

3. Observe su nivel de glucosa después de comer diferentes carbohidratos. Alrededor de dos horas después de una comida, observe que sucede con su glucosa. Por ejemplo, si come 1 taza de arroz y su glucosa sube mucho, considere disminuir a ½ taza o saltarse el arroz por completo. Tenga en cuenta la diferencia en su glucosa.

4. Trate de sustituir diferentes carbohidratos. Toma una tostada integral con 3 gramos de fibra, un vaso de leche descremada y un huevo duro (250-300 calorías). Compare su glucosa con los días cuando come un tazón de cereal y leche (250-300 calorías). Fíjate lo que hace que te sientas satisfecho por más tiempo.

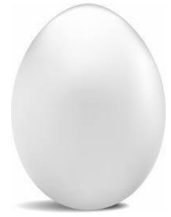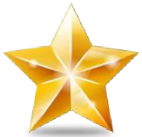

Clave: Límite el tamaño de las porciones y elija alimentos con alto contenido de fibra.

| <b>Nutrition Facts</b>        |                      |
|-------------------------------|----------------------|
| 8 servings per container      |                      |
| <b>Serving size</b>           | <b>2/3 cup (55g)</b> |
| <b>Amount per serving</b>     |                      |
| <b>Calories</b>               | <b>230</b>           |
| <b>% Daily Value*</b>         |                      |
| <b>Total Fat</b> 8g           | <b>10%</b>           |
| Saturated Fat 1g              | <b>5%</b>            |
| Trans Fat 0g                  |                      |
| <b>Cholesterol</b> 0mg        | <b>0%</b>            |
| <b>Sodium</b> 160mg           | <b>7%</b>            |
| <b>Total Carbohydrate</b> 37g | <b>13%</b>           |
| Dietary Fiber 4g              | <b>14%</b>           |
| Total Sugars 12g              |                      |
| Includes 10g Added Sugars     | <b>20%</b>           |
| <b>Protein</b> 3g             |                      |
| Vitamin D 2mcg                | 10%                  |
| Calcium 260mg                 | 20%                  |
| Iron 8mg                      | 45%                  |
| Potassium 235mg               | 6%                   |

\* The % Daily Value (DV) tells you how much a nutrient in a serving of food contributes to a daily diet. 2,000 calories a day is used for general nutrition advice.

Apunta a por lo menos 3 gramos de fibra. por ración y no más de 5 gramos de azúcar agregado.

## Azúcar Agregado y Azúcar Natural

- 1- Como norma, evite los alimentos que tengan más de 5-10 gramos de azúcar agregado. Por ejemplo, el yogur saborizado puede tener entre 18 y 20 gramos de azúcar. Controle su glucosa después de comer su típico yogur en comparación con ½ taza de yogur griego natural con ¼ de taza de arándanos frescos u otra fruta fresca.
- 2- La fruta es saludable, pero contiene azúcar natural. Demasiada cantidad puede hacer que su glucosa se dispare. Una porción típica de fruta suele ser del tamaño de una pelota de tenis. Los ejemplos incluyen: 1 manzana pequeña, ½ plátano, ¾ taza de bayas o 15 uvas. Observe su nivel de glucosa después de comer ½ taza de puré de manzana en comparación con una manzana pequeña.

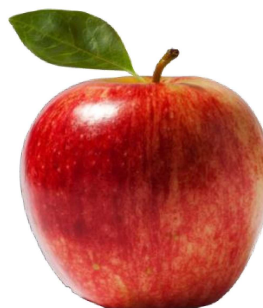

## Bebidas azucaradas:

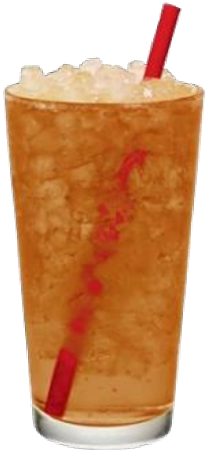

1. Nuestro cuerpo solo necesita agua, pero hemos entrenado nuestros cuerpos para anhelar el azúcar. Los jugos de frutas, las gaseosas, Gatorade®, las bebidas de café endulzadas están llenas de azúcar. ¡Si usted bebe estos, notará un aumento en su valor de glucosa en el RT-MGC!
2. Renunciar a las bebidas azucaradas puede ser un hábito difícil de cumplir, pero marcará una gran diferencia. Trate de sustituir las bebidas azucaradas con agua con limón u otros sabores sin calorías. Note la diferencia en su glucosa. Si sus bebidas son sin azúcar... ¡buen trabajo!

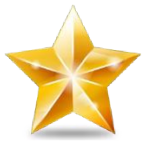

Clave: Evite los azúcares agregados y coma azúcar natural (como en la fruta) con moderación.

## Grasa:

1. Gramo por gramo, la grasa contiene más calorías que otros nutrientes. Las grasas pueden estar “ocultas” en los alimentos que ya comemos. Por ejemplo, cuando usted bebe una taza de leche descremada en comparación con una taza de leche al 2%, usted bebe la misma cantidad, pero las calorías en la leche al 2% son bastante más altas. Una taza de porotos verdes con ajo y pimienta en comparación con mantequilla te da la misma cantidad de porotos verdes,

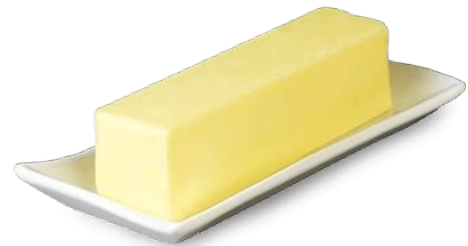

pero muchas más calorías cuando se agrega mantequilla. Eliminar un poco de grasa es una buena manera de reducir las calorías.

2. Si bien no hay "carbohidratos" en las grasas, comer demasiadas grasas puede provocar un aumento sostenido de la glucosa durante muchas horas. Esto se debe a que la grasa causa resistencia a la insulina (la propia insulina de su cuerpo no funciona tan bien). Observe su glucosa de 4 a 8 horas después de una comida rica en grasas. Considere elegir cortes de carne más magros y limitar algunos alimentos ricos en grasas, como la crema agria o la mayonesa.

3. Incluso las "grasas buenas", como las nueces, pueden aumentar su glucosa, lo que resalta la necesidad de porciones pequeñas, como no más de 15 a 18 nueces por porción. Las grasas no saturadas son mejor opción que las saturadas, pero aún debe prestar atención a la cantidad.

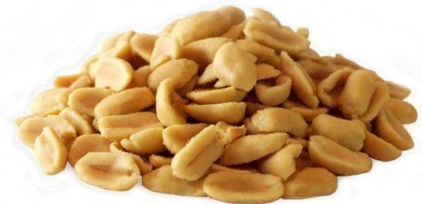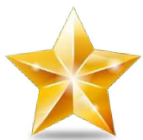

**Clave:** Recuerde que la grasa es la más alta en calorías. Disminuya sus calorías totales eliminando algunas grasas o cambiando a opciones bajas en grasas.



## Alcohol:

Lamentablemente, el alcohol es otra “caloría vacía”. Controle sus niveles de azúcar en la sangre después de una bebida mezclada o una cerveza. Limite el alcohol tanto como sea posible.

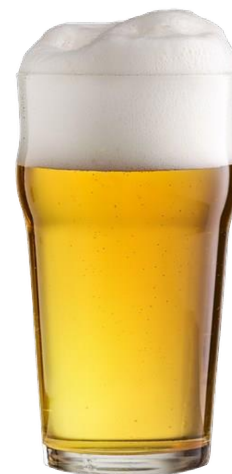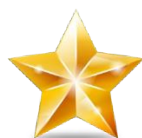

Clave: ¡No beba sus calorías!

## Actividad física:

1. La actividad física tiene muchos beneficios, incluyendo la pérdida de peso, la reducción de la presión arterial y la mejora del colesterol. Además,

la actividad de ligera a moderada, como caminar, puede reducir la glucosa. Apunta a tus 30 minutos al día de actividad de intensidad moderada y luego aumenta con el tiempo. Intensidad moderada significa que su corazón está latiendo un poco más rápido y está respirando un poco más fuerte (sin estar con tanta falta de aire).

### Efecto de la ACTIVIDAD sobre la Glucosa

|     |                                  |
|-----|----------------------------------|
| → ↓ | Ejercicio de baja intensidad     |
| ↑ ↓ | Ejercicio de intensidad moderada |
| ↑ ↓ | Ejercicio de alta intensidad     |

2. Considere agregar 10 minutos de caminar o subir las escaleras después de cada comida además de su ejercicio planificado. Utilice su consumo de alimentos como un disparador; después de cada comida, salga a caminar y vea cómo afecta su glucosa.

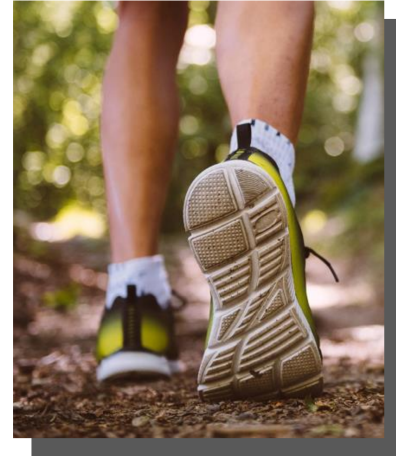

3. La actividad de moderada a intensa, como el levantamiento de pesas, el entrenamiento en intervalos o las carreras de velocidad, puede aumentar inicialmente el nivel de azúcar en la sangre, pero luego mejorar el nivel de azúcar en la sangre a lo largo del día.

4. Agregue más caminatas a sus actividades diarias. Camine como parte de su viaje. Elija un lugar más alejado en el estacionamiento. En lugar de tomar el transbordador, camine. Vaya por las escaleras. ¡Agregar pasos a su rutina diaria es una excelente manera de aumentar la actividad física y aliviar el estrés!

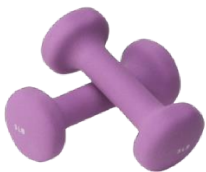

5. Esté preparado para enfrentar los obstáculos ¿Qué harás si hay mal tiempo? ¿Qué harás si se vuelve aburrido? Si tiene un plan para abordar estas situaciones, es más probable que se mantenga encaminado.

6. Compare su nivel de glucosa en los días en que es más activo frente a los días en que es menos activo.

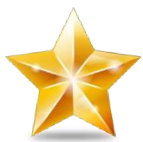

Clave: La actividad física puede reducir la glucosa, entre otras cosas. Trabajar más "pasos" en su día es una excelente manera de aumentar su nivel de actividad física y todos los beneficios que conlleva.

## Glucosa Sanguínea Baja:

1- Si usa insulina o una pastilla que hace que su cuerpo libere más insulina, puede correr el riesgo de tener un nivel bajo de glucosa sanguínea. Cuando pierde peso o elige alimentos más saludables, es posible que necesite menos medicamento(s) para la diabetes.

2- Los síntomas de glucosa baja incluyen temblores, sudar, confusión, sensación de debilidad y posiblemente hambre. Si siente estos u otros síntomas inusuales, verifique con una prueba de punción del dedo en su medidor de glucosa.

3- Para tratar la glucosa baja, debe comer/beber algo con aproximadamente 15 gramos de carbohidratos/azúcar. Esto podría incluir  $\frac{1}{2}$  taza de jugo, una taza de leche descremada, o 3 a 4 tabletas de glucosa. Tomará al menos 15 minutos para que estos azúcares tengan efecto. Si su glucosa sigue siendo inferior a 70 mg/dL después de 15 minutos, trate con otros 15 gramos de azúcar.

4- Si tiene lecturas inferiores a 70 mg/dL, debe hablar con su médico. Pregunte si debe reducir las dosis de sus medicamento(s) para evitar niveles bajos de glucosa.

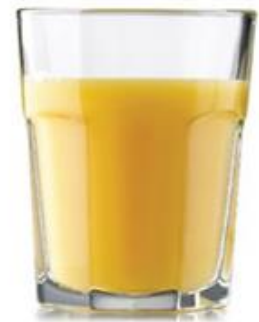

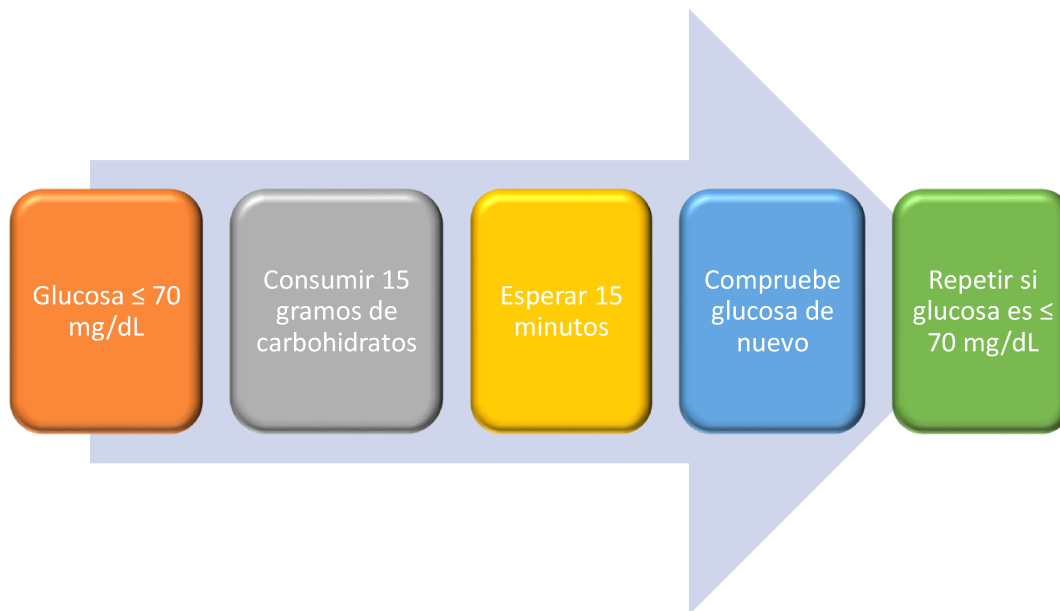

## MCG en tiempo real (RT-CGM) Dexcom

**Sus metas para los 3 meses:** ¡Mejore sus niveles de glucosa y aprenda qué le hacen a su glucosa los alimentos y la actividad!

1. Revise los siguientes valores en su aplicación Clarity para cada sesión de 10 días:

- Promedio de glucosa antes de las comidas
- Promedio de glucosa después de las comidas
- Glucosa promedio durante el período total de uso

2. Identificar los factores que resultaron en los mejores y peores valores de glucosa.

3. Elija alimentos y actividades que mejoren su nivel de glucosa antes y después de las comidas. Continúe registrando su comida, actividad, los valores de glucosa antes y después de las comidas en el registro.

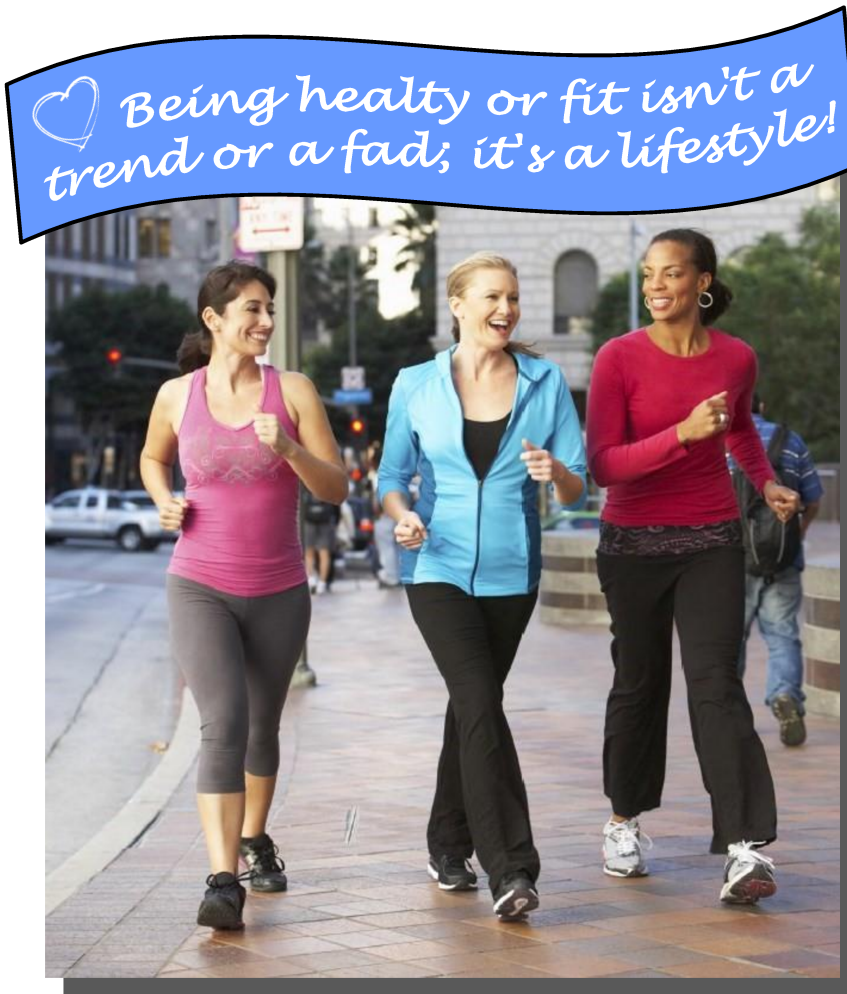

¡Estar saludable o en forma no es una tendencia o una moda pasajera, es un estilo de vida!

[The people depicted are not meant to endorse, or be associated with, the products they are using.](#)
