# Supplementary material for: Effectiveness of a culturally tailored diabetes education curriculum with real-time continuous glucose monitoring in a Latinx population with type 2 diabetes: the CUT-DM with CGM for Latinx randomised controlled trial study protocol
Source: PubMed Central journal article supplement — BMJ Open. 2023 Dec 28;13(12):e082005. doi: 10.1136/bmjopen-2023-082005 (PMC10759074; doi:10.1136/bmjopen-2023-082005), 2023-12-28
Supplement: bmjopen-2023-082005supp004.pdf [file bmjopen-2023-082005supp004.pdf]

**UNIVERSIDAD DE WASHINGTON**  
**FORMULARIO DE CONSENTIMIENTO**  
**Compañeros en Salud y Monitorización Continua de Glucosa en Tiempo REAL**

**Investigadora Principal:** Nicole Ehrhardt, MD  
Título: Profesor Asistente de Medicina  
Departamento: Instituto de Endocrinología y Diabetes  
Dirección: 750 Republican St, F building, 3rd Floor, Seattle, WA 98109  
Número telefónico: 206-598-4882  
Correo electrónico: [nehrhard@uw.edu](mailto:nehrhard@uw.edu)

Preguntas sobre el estudio: Evelin Jones, Coordinadora de investigación  
Número telefónico: 206-221-9369

**Declaración del investigador**

Lo invitamos a participar en nuestra investigación. El propósito de este formulario de consentimiento es brindarle la información necesaria para ayudarlo a decidir si desea participar en nuestro estudio. Favor de leer el formulario completo. Lo invitamos a hacer cualquier pregunta sobre nuestra investigación. Esperamos que al contestar todas sus preguntas, usted pueda decidir si desea participar en el estudio o no, ya que su participación en el estudio sería completamente voluntaria. Le daremos una copia de este formulario para sus registros. Este proceso se llama "consentimiento informado".

**INFORMACIÓN IMPORTANTE DEL ESTUDIO**

El estudio "Compañeros en Salud" con monitoreo continuo de glucosa comparará cómo funciona un programa de educación sobre la diabetes apropiado a la cultura Latina, en inglés y español, con y sin un dispositivo de monitoreo continuo de glucosa (azúcar) (CGM).

¿POR QUÉ ESTAMOS HACIENDO ESTE ESTUDIO Y QUÉ SE LE PEDIRÁ HACER SI PARTICIPA?

Al realizar este estudio, esperamos aprender si la intervención educativa ayuda a mejorar el cuidado de la Diabetes. Al mismo tiempo, estamos interesados en aprender si el monitoreo continuo de azúcar, y la intervención educativa juntas pueden tener mejores resultados en el control de la diabetes. Usted recibirá educación sobre la diabetes y puede ser asignado a un grupo el cual tendrá el dispositivo de monitoreo de los niveles de azúcar en sangre en tiempo real (RT). El segundo grupo también recibirá el programa de educación, pero puede que no reciba el dispositivo para monitorear los niveles de azúcar en tiempo real.

¿Cuál serían algunas razones para no PARTICIPAR EN ESTE ESTUDIO?

Se le pediría atender clases para aprender sobre el manejo y control de la diabetes. Es posible que prefiera simplemente continuar trabajando con su médico de cabecera en controlar su diabetes y no recibir educación sobre diabetes. También es posible que no esté interesado/a en recibir el dispositivo de monitoreo continuo de glucosa. Se le asignará

Version 6.0, 2-22-23

aleatoriamente para utilizar o no un CGM en tiempo real. Esto será decidido al azar, no por usted ni por el equipo de estudio.

### ¿CUALES SON ALGUNAS RAZONES PARA PARTICIPAR EN ESTE ESTUDIO?

La educación sobre la diabetes puede ayudar a mejorar su diabetes y ayudarle a vivir una vida saludable. Además, el dispositivo de monitoreo continuo de glucosa (CGM) puede ayudarle a mejorar el control de diabetes aún más de lo que ya lo está haciendo.

### ¿TIENE QUE PARTICIPAR EN EL ESTUDIO?

No, no tiene que participar en el estudio. Si decide participar en el estudio, debe ser porque realmente desea ser voluntario. Si decide no hacerlo, no perderá ningún servicio, beneficio o derecho que ya tiene y seguirá recibiendo tratamiento para su diabetes. También es importante que usted sepa que puede retirarse en cualquier momento durante el estudio.

### ¿Y SI QUIERE MÁS INFORMACIÓN?

El resto de este documento le brinda más información sobre el estudio, incluyendo:

- Qué se hará en las visitas de investigación
- Los riesgos del estudio
- Quién pagará el tratamiento si se lesiona por los procedimientos del estudio
- Cómo protegeremos su privacidad
- Con quién hablar si tiene problemas, sugerencias o inquietudes

## **PROPÓSITO DEL ESTUDIO**

Este estudio proporcionará un programa de educación sobre diabetes apropiado a la cultura Latina, en inglés y español. Algunos participantes usarán un monitor continuo de glucosa (CGM). Queremos saber si la educación sobre la diabetes ayuda a reducir los niveles de azúcar, y si el monitoreo continuo de glucosa lo hace aún más útil.

## **PROCEDIMIENTOS DE ESTUDIO**

El estudio se llevará a cabo a través de clínicas de salud de Sea Mar, clínicas de la Universidad de Washington y de la comunidad. El estudio incluirá a 100 personas con diabetes tipo 2.

Puede negarse a responder cualquier pregunta, prueba, inventario, cuestionario o entrevista.

Se le asignará aleatoriamente a **uno de dos grupos**:

1. Este grupo recibirá educación sobre diabetes de Compañeros en Salud sin el monitoreo continuo de la glucosa (CGM).

- Se le pedirá que use un CGM que esté **cegado**: Esto significa que no le mostrará sus números de azúcar en la sangre hasta el final del estudio.
  - Usted continuará analizando su nivel de azúcar en la sangre usando su medidor de glucosa como lo recomienda su doctor de cabecera.
2. Este grupo recibirá educación sobre diabetes de Compañeros en Salud con el monitoreo continuo de la glucosa (CGM).
- Se le pedirá que use un CGM que no esté **cegado**: Esto significa que le mostrará sus números de azúcar en la sangre en tiempo real (RT), a medida que están sucediendo.
  - El grupo en el que se encuentra se decide al azar (como lanzar una moneda al aire). Tiene las mismas posibilidades de estar en cualquiera de los dos grupos.

### ¿Qué es un dispositivo de monitoreo continuo de la glucosa (CGM)?

El monitoreo continuo de glucosa (CGM) es una forma de medir el nivel de azúcar o glucosa en la sangre. El dispositivo funciona de la siguiente manera: Guarda los números de azúcar en la sangre para que pueda verlos todo el tiempo (en tiempo real) o puede verlos más tarde. El dispositivo (CGM) tiene un filamento delgado y flexible que se inserta debajo de la piel y solo requiere un pinchazo en la piel. Los lugares del cuerpo donde se puede poner el dispositivo son los siguientes: puede usarlo en el estómago, brazo o gluteo. Una vez que está colocado, el dispositivo puede permanecer allí por 10 días. Un transmisor pequeño es usado sobre la piel donde está colocado el dispositivo para registrar los valores de azúcar. El dispositivo entero es aproximadamente del tamaño de una pequeña galleta. El transmisor envía los resultados de glucosa de forma electrónica a un teléfono inteligente o a un dispositivo donde podrá verlos inmediatamente, o más tarde.

También puede utilizar una aplicación de teléfono celular llamada Dexcom Clarity. Esta aplicación puede compartir sus números de azúcar en la sangre con el equipo de investigación. También puede optar por compartir estos números con un miembro de su familia, pero solo si usted lo desea. Para compartir los niveles de azúcar en la sangre, su familiar también deberá usar la aplicación y tener su permiso para ver sus niveles de azúcar.

Le daremos todos los materiales que necesitará. Tendrá un sobre con franqueo pre pago para devolver el dispositivo por correo al final de los 10 días. Si no puede enviarlo por correo, un Navegador del Paciente (Patient Navigator), anteriormente conocido como trabajador de salud comunitario (CHW) o educador de salud (HE) puede ir a su casa para recogerlo o puede llevarlo a la clínica.

A veces, un CGM puede caerse accidentalmente o dejar de funcionar antes del final de los 10 días. Si esto sucede dentro de los primeros 3 días, le daremos un nuevo CGM.

### ¿Cuánto tiempo dura el estudio y qué debo hacer?

Su participación en el estudio será por 6 meses **con las siguientes visitas:**

Version 6.0, 2-22-23

- 3 visitas de investigación programadas (1-1.5 horas cada una),
- 1 visita con el navegador del paciente o educadores de salud para enseñanza (1-1.5 horas), que podría ser junto con la primera visita del estudio,
- 12 clases de diabetes (1-1.5 horas cada una, ofrecidas en diferentes momentos en inglés y español) con un tiempo total de participación en el estudio de aproximadamente 25 horas.

Si desea participar en este estudio, le pediremos que lea y firme este documento de consentimiento antes de darnos algún dato. Las visitas de investigación se llevarán a cabo a través de telemedicina en su hogar o, si lo prefiere, en una Clínica local de Sea Mar o de la Universidad de Washington. Puede optar por hacer parte de las visitas en su casa y parte en una clínica.

Si firma este formulario en línea, se le enviará por correo electrónico una copia del formulario de consentimiento a una dirección de correo electrónico que proporcione. Será un documento "PDF". La mayoría de las computadoras ya tienen instalado el software de PDF, que le permitirá abrir, leer o imprimir el formulario de consentimiento. El correo electrónico que le enviemos incluirá un enlace al software de PDF (como Adobe Acrobat Reader) en caso de que su computadora aún no lo tenga. Sin costo alguno usted puede recibir una copia impresa del formulario de consentimiento. Si desea retirar su consentimiento, comuníquese con el coordinador de la investigación en la página 1 de este formulario de consentimiento.

También le pediremos que proporcione información de un contacto (número de teléfono, dirección, correo electrónico e información de contacto de familiares y / o amigos). Nosotros solo utilizaremos esta información para contactarlo acerca de las clases, las visitas, y para obtener los datos dados por el dispositivo que mide sus niveles de glucosa.

Después de firmar este consentimiento informado, le mediremos su hemoglobina A1C por medio de una punción en un dedo. Este análisis de sangre nos da un promedio de su nivel de azúcar en la sangre de los últimos 2-3 meses. Si usted es mujer, también le pediremos una prueba de embarazo en orina, ya que nuestro estudio no incluirá a mujeres embarazadas. Si la visita inicial no es en persona, es posible que le pidamos que vaya al laboratorio para una muestra de sangre y una prueba de orina. No puede participar en el estudio si su A1C es inferior a 8.0 o si está embarazada. Si durante el periodo del estudio usted llegase a quedar embarazada, usted continuará su diabetes y atención del embarazo con su proveedor de atención médica, y no continuará en el estudio.

### **1. Visita 1: Detección y recopilación de datos**

- Se lleva a cabo 2-4 semanas antes de la primera clase de diabetes
- Tardará de 1 a 1,5 horas en completarse
- Mediremos su altura, peso, presión arterial y circunferencia de la cintura (usando una cinta métrica alrededor de su cintura).
- Le haremos preguntas sobre su diabetes, su salud y sus hábitos.
- Le asignaremos aleatoriamente a las clases de diabetes con o sin CGM.
- Le diremos las fechas de las 12 clases semanales (en español o inglés).

Version 6.0, 2-22-23

- Le pediremos que use un app en su teléfono para contar sus pasos y así medir cuanto camina, Si no tiene un app en su teléfono, le daremos un dispositivo llamado podómetro y le mostraremos cómo usarlo. Le pediremos que use el podómetro o mantenga su teléfono con usted mientras está despierto tanto como sea posible durante el estudio.
- Le daremos una tarjeta de regalo de \$ 50.00 al final de la visita.

## **2. Visita de seguimiento con un Navegador del Paciente (PN) , un educador de salud (HE) o personal del estudio.**

El mismo día de la primera visita del estudio o en otro momento, en su casa o en la clínica local, antes de comenzar las clases de diabetes, un Navegador del Paciente (PN) o educador de salud (HE) o personal del estudio, lo visitará o usted puede ir a verlo en una clínica local para que:

Le ayuden con Zoom y acceso a Internet. Si usted no tiene acceso a internet en su casa, le proveeremos con un dispositivo con acceso a internet para que use durante las 12 clases. También le mostrarán cómo insertar el CGM. Le ayudarán a resolver problemas comunes que las personas a veces tienen al usar los CGM.

Si está en el grupo de tiempo real (RT-CGM), el Navegador del Paciente/ HE lo ayudará a instalar la aplicación Clarity en su teléfono que necesitará para usar el dispositivo. Le mostrarán cómo compartirlo con los miembros de la familia si así lo desea. El Navegador del Paciente / HE también hablará con usted sobre cómo los alimentos y la actividad física afectan su nivel de azúcar en la sangre. Le enseñarán cómo usar el CGM para ver sus niveles de azúcar en la sangre y lo ayudarán a comprender lo que significan los números.

El Navegador del Paciente /HE le dará un registro de alimentos y actividades. Si elige una visita de telemedicina / Zoom, el Navegador del Paciente /HE puede preguntarle si puede verlo en persona para hacer mediciones (A1C y mediciones corporales).

Después de la visita 1, todos los participantes en ambos grupos usarán un CGM ciego durante 10 días. Esto significa que no verá sus números de azúcar en la sangre. Luego devolverá el CGM en la primera clase de diabetes en persona, o puede enviarlo por correo.

Si no obtiene un CGM, continuará controlando sus valores de azúcar según lo recomendado por su médico mediante una punción en el dedo.

## **3. Clases de Educación: Clases compañeros en salud**

A continuación, asistirá a clases semanales de educación sobre la diabetes durante 12 semanas.

Estas serán clases grupales una vez a la semana a través de tele salud / Zoom o en un aula de Sea Mar. Usted estará en la clase con otras personas que tienen diabetes tipo 2. Le pediremos que asista a las 12 clases. Cada clase durará 1-1.5 horas. Le daremos todos los materiales para cada clase.

Version 6.0, 2-22-23

Estas clases utilizarán la plataforma Zoom. Las clases se grabarán para que pueda verlas más tarde. Antes de unirse a cada clase, verá un mensaje que dice que la sesión será grabada. Además, aunque le animamos a que aparezca en cámara durante las clases, no tiene que hacerlo. Puede elegir mostrar u ocultar su cámara.

Al final de la primera clase, las personas que estén en el grupo de monitoreado en tiempo real (RT-CGM), recibirán 15-30 minutos de educación sobre comida y actividades y como ver lo que está pasando con su azúcar en el CGM. Les mostraremos como empezar a usar el dispositivo CGM al final de esta clase, los Navegadores del Paciente / HE o personal del estudio quizá lo contacten al día siguiente para asegurarse de que no esté teniendo ningún problema usando el dispositivo.

#### **4. Visita de estudio 2**

Al final de las 12 clases, haremos lo siguiente:

- Le haremos preguntas sobre su diabetes
- Mediremos una A1C para ver cómo han sido sus niveles de azúcar en la sangre
- Haremos las mismas mediciones corporales que hicimos en su primera visita.
- Le entregaremos una tarjeta de regalo de \$ 50.00 al final de la visita.
  
- Si no está en el grupo de CGM en tiempo real (RT-CGM):
  - Usted usará un CGM ciego una vez más durante 10 días, empezando 3 días antes de la clase 11, el cual va a devolver después de 10 días. Si se olvida, lo puede empezar a usar lo antes posible.
  - El Navegador del Paciente /HE o el personal del estudio de investigación lo ayudarán a insertar el CGM ciego a través de telemedicina o en persona si es necesario.
  - Usted no verá sus niveles de azúcar en la sangre
  
- Si está en el grupo CGM en tiempo real (RT-CGM):
  - Usará el RT-CGM una vez más durante 10 días, comenzando 3 días antes de la clase 11. Si se olvida, lo puede empezar a usar lo antes posible.
  - Podrá ver sus niveles de azúcar en la sangre a medida que ocurren.

Después de la visita número dos, continuará trabajando en su diabetes con su médico de atención primaria. Las clases de diabetes y el uso de RT-CGM habrán terminado. Debe preguntarle a su médico si tiene alguna pregunta sobre su diabetes.

#### **5. Visita de estudio 3**

Esta visita será 3 meses después de la última clase de diabetes.

Pediremos a todos los participantes que usen un sensor cegado durante 10 días. Esta será la última vez que lo usarán. Le haremos las mismas preguntas que le hicimos en sus otras visitas. También mediremos la A1C y las medidas corporales.

#### **¿Cuándo usa el RT-CGM?**

Version 6.0, 2-22-23

Si está en el grupo de dispositivos de monitoreo continuo de glucosa en tiempo real (RT-CGM), después de su primera clase de diabetes, comenzará a usar el dispositivo durante un total de cinco ciclos de 10 días de uso. Recibirá 2 sensores adicionales en caso de que el CGM se caiga o se salga antes.

- Comience a usar el RT-CGM una vez que complete su primera clase de diabetes. Usar durante 10 días.
- Luego deje de lado durante 7 días
- Luego vuelva a usarlo durante 10 días
- El ciclo de uso es durante 10 días, luego descanso durante 7 días y luego de uso durante 10 días hasta que haya completado un total de 50 días (5 sesiones) de uso del sensor.
- El objetivo es iniciar el último sensor 3 días antes de la clase educativa número 11 y usarlo por 10 días.

Esta tabla muestra el programa de visitas, la información que se recopilará y el programa de uso de CGM para cada grupo.

| Tipo de Visita                                                       | Detección y Visita 1 (Primera Visita) | Visita 2                                                                | Visita 3              |
|----------------------------------------------------------------------|---------------------------------------|-------------------------------------------------------------------------|-----------------------|
| Semana de estudio                                                    | Semana Cero                           | Semana 12*                                                              | Semana 24*            |
| Lea y firme el consentimiento informado                              | <b>X</b>                              |                                                                         |                       |
| Contacto de emergencia                                               | <b>X</b>                              |                                                                         |                       |
| Prueba de embarazo en orina (Mujeres)                                | <b>X</b>                              |                                                                         |                       |
| Datos demográficos                                                   | <b>X</b>                              | <b>X</b>                                                                | <b>X</b>              |
| Medicamentos, historial médico                                       | <b>X</b>                              | <b>X</b>                                                                | <b>X</b>              |
| Cuestionarios                                                        | <b>X</b>                              | <b>X</b>                                                                | <b>X</b>              |
| Análisis (Prueba) de sangre por punción digital HbA1C                | <b>X</b>                              | <b>X</b>                                                                | <b>X</b>              |
| Presión arterial, pulso, altura (estatura), peso, medidas de cintura | <b>X</b>                              | <b>X</b>                                                                | <b>X</b>              |
| Podómetro durante 10 días                                            | <b>X</b>                              | <b>X</b>                                                                | <b>X</b>              |
| Visita del navegador del paciente                                    | <b>X</b>                              |                                                                         |                       |
| <b>Asignación aleatoria al grupo CGM</b>                             | <b>X</b>                              |                                                                         |                       |
| Grupo CGM cegado                                                     | CGM Cegado<br>10 días                 | CGM Cegado<br>10 días                                                   | CGM Cegado<br>10 días |
| <b>Grupo RT-CG</b>                                                   | CGM Cegado<br>10 días                 | <b>RT-CGM</b><br>(cinco ciclos durante 10 días, siete días de descanso) | CGM Cegado<br>10 días |
| 12 semanas de clases de diabetes                                     |                                       | <b>X</b>                                                                | <b>X</b>              |
| Encuesta a miembros de la familia (ambos grupos)                     | <b>X</b>                              | <b>X</b>                                                                |                       |

Version 6.0, 2-22-23



|                           |          |          |          |
|---------------------------|----------|----------|----------|
| Tarjeta de regalo de \$50 | <b>X</b> | <b>X</b> | <b>X</b> |
|---------------------------|----------|----------|----------|

\* dentro de 2 semanas de esta fecha.

Después de completar el estudio, al final de la visita 3, le ofreceremos a los participantes del grupo control/ciego que expresen interés, la posibilidad de usar 3 sensores Dexcom en Tiempo Real mientras tengamos suficientes suministros. No tendrá que pagar por estos sensores. Los datos recolectados por estos dispositivos no se utilizarán en el estudio, y el equipo del estudio no tendrá acceso a estos datos.

Si recibe estos 3 sensores, será responsable de informar todos los valores de glucosa recopilados por estos dispositivos a su equipo clínico de Seamar, y deberá comunicarse con este equipo si tiene problemas o preguntas sobre el uso de los sensores.

### **RESPONSABILIDADES**

#### **Clases de Compañeros en Salud (Ambos Grupos)**

Es importante que complete todas las visitas del estudio, los procedimientos y las clases para ayudarnos a saber qué tan útil será el programa de educación sobre la diabetes.

**CGM Cegado:** Todos los participantes en ambos grupos usarán un dispositivo CGM cegado 10 días antes de la primera clase de diabetes, después del final de la última clase y nuevamente 3 meses después.

#### **Clases de Compañeros en Salud con RT-CGM**

Si está en el grupo de CGM en tiempo real, es importante que use el RT-CGM en los momentos programados para que podamos aprender qué tan útil es el CGM. Le pediremos que use el CGM durante 10 días, en 5 sesiones durante 12 semanas. Si no puede usar el CGM, comuníquese con el personal del estudio.

#### **Participación de los miembros del hogar:**

Si tiene hijos mayores de 8 años, cónyuge/pareja u otros miembros del hogar:

- Preguntaremos si estarían dispuestos a completar un cuestionario de menos de 10 minutos sobre sus hábitos alimenticios y actividad.
- Si se le asigna al grupo RT-CGM, les haremos algunas preguntas sobre el CGM (si son mayores de 13 años).

Para los miembros del hogar mayores de 17 años, si no están presentes durante su visita, le preguntaremos si está bien que los llamemos. Si está de acuerdo, les haremos preguntas por teléfono o correo electrónico. Le preguntaremos cuál es la mejor hora para comunicarnos con el miembro de su hogar. NO se recolectará información personal de salud sobre los miembros del hogar. El nombre, la relación con usted, la edad, el correo electrónico y el número de teléfono solo se utilizarán para contactar a los miembros del hogar que usted crea que podrían estar interesados.

No acepto que los miembros de mi hogar participen \_\_\_\_\_

Version 6.0, 2-22-23

Acepto que los miembros de mi hogar participen si así lo desean\_\_\_\_\_

### **Junta Asesora**

Se solicitará a un número pequeño de participantes que formen parte de un consejo asesor. Esperamos mejorar las clases de diabetes y discutir cualquier desafío que las personas puedan tener al participar en las clases de diabetes y en las sesiones de telemedicina. Le pediremos a los 3 primeros participantes que se inscribieron y también a los 2 primeros participantes que dejaron de ir a las sesiones que formen parte del consejo asesor. Si estos eligen no participar, continuaremos preguntando al siguiente participante inscrito hasta que tengamos 3 participantes que hayan asistido a las sesiones educativas y 2 participantes que hayan dejado de asistir a las sesiones. Le haremos preguntas ya sea en un entorno grupal o individual, ya sea por tele-visita /zoom o por teléfono acerca de vivir con diabetes y cualquier barrera o dificultad que experimente. Las entrevistas durarán aproximadamente entre 45 a 60 minutos y se grabará el audio para garantizar que todas las respuestas sean entendidas/ recopiladas para luego resumirlas de manera general para abarcar a todos los participantes.

### **RIESGOS, ESTRÉS O INCOMODIDAD (MALESTAR) ¿EXISTEN RIESGOS EN ESTE ESTUDIO?**

Los riesgos relacionados con su atención médica normal no se enumeran en este formulario. Le recomendamos que hable sobre esto con su médico del estudio, su proveedor de atención primaria u otro profesional de la salud.

Participar en una investigación implica algunos riesgos de daño o malestar físico o psicológicos. Siempre existe la posibilidad de que ocurran lesiones desconocidas o inesperadas.

### **Los riesgos más probables de este estudio se describen a continuación:**

#### **Monitoreo Continuo de Glucosa**

El sensor CGM puede causar dolor cuando se inserta en la piel, como una inserción en el sitio de la bomba de insulina o una inyección de insulina. En raras ocasiones, puede ocurrir una infección de la piel en el sitio de inserción del sensor. Puede ocurrir picazón, enrojecimiento, sangrado y moretones en el sitio de inserción. Una alergia a la cinta que sujeta el sensor a la piel es posible. El riesgo de un problema en la piel podría ser mayor si usa un sensor durante más tiempo del que se supone que se debe usar. Existe la posibilidad de que el sensor o la aguja se rompan debajo de la piel. No se espera que esto ocurra, pero si ocurre, debe preguntarle al médico del estudio qué hacer.

Al igual que los glucómetros, o medidores de glucosa en sangre, que puede usar actualmente, es posible que el dispositivo CGM no proporcione una lectura precisa. Esto puede suceder debido a un mal funcionamiento, problemas con la batería o al apagar accidentalmente las alarmas. Si siente que la lectura de azúcar en la sangre de su CGM es diferente, debe revisar su nivel de azúcar en la sangre con el monitor de glucosa que su proveedor de atención primaria le haya proporcionado previamente para su control de la diabetes.

Version 6.0, 2-22-23

El uso de acetaminofeno (Tylenol) puede dar lecturas inexactas si toma más de la dosis recomendada de 3000 mg al día. Le recomendamos no tomar más de la dosis recomendada por día de este medicamento.

Con el dispositivo CGM, es posible que se sienta incómodo o inseguro sobre el uso de un dispositivo médico en su cuerpo durante 10 días seguidos.

### **Riesgo de Hipoglucemia e Hiperglucemia**

Como una persona con diabetes, siempre existe el riesgo de tener un nivel bajo de azúcar en la sangre (hipoglucemia) o un nivel alto de azúcar en la sangre (hiperglucemia). Los síntomas de un nivel bajo de azúcar en la sangre pueden incluir sudoración, debilidad, temblores y no sentirse bien. Los síntomas de un nivel alto de azúcar en la sangre pueden incluir aumento de sed, cansancio, visión borrosa e irritabilidad. Las clases de diabetes le enseñarán cómo evitar niveles bajos de azúcar en sangre y qué hacer si esto sucede. Además, si ve niveles muy altos de azúcar, debe consultar a su médico de atención primaria para que lo ayude a controlar los niveles altos de azúcar.

### **Incomodidad de punción en el dedo**

Cuando hacemos una punción en el dedo para la prueba A1C, es posible que tenga una ligera molestia en el sitio de la punción. Esto es similar a las punciones en los dedos que se hace cuando se mide el nivel de azúcar en la sangre. También existe el riesgo de mareos, moretones y posible infección con pinchazos en los dedos para la diabetes.

### **Cuestionarios y Medidas Clínicas**

Le haremos preguntas sobre sus actitudes, sentimientos y comportamientos relacionados con la diabetes y en general. Aunque es poco común, es posible que algunas personas encuentren estas preguntas un poco molestas. Puede negarse a responder cualquier pregunta que lo haga sentir incómodo(a). Puede decidir no contestar preguntas, tomar un descanso o dejar de participar en el estudio en cualquier momento. Se tomarán muchas precauciones para mantener su información confidencial, pero esto no es una garantía.

**Las clases de diabetes** se brindarán virtualmente por Zoom, o en persona en una clínica de Seamar asignada. Los Navegadores del Paciente y los educadores de la salud (HE) utilizarán las oficinas/espacios educativos de Sea Mar para dirigir las sesiones. Las sesiones nocturnas pueden llevarse a cabo desde la casa del educador usando un espacio privado para garantizar la privacidad de los participantes.

### **Pérdida de privacidad**

Recopilaremos los números de azúcar en la sangre de los CGM que le daremos. Tendremos información detallada sobre su diabetes y hábitos diarios de salud. Algunas personas pueden sentirse incómodas con esto. El equipo del estudio verá sus datos de CGM. También veremos la información utilizada para crear cuentas de estudio para las descargas de datos de CGM. Debido a que las clases de diabetes se llevarán a cabo en grupo, otras personas que asistan a las clases pueden verlo(a) y escuchar las preguntas que hace o la información que comparte.

**Manguito de presión arterial:** El manguito de presión arterial puede causar una ligera molestia cuando se infla, pero se desinfla en segundos.

**Junta Asesora y entrevistas individuales:** Puede ser que se ponga nervioso o le sea avergonzante hablar sobre porque dejó de ir a las sesiones o las barreras que no le permiten acceder al cuidado de salud con respecto a la diabetes. Si comienza a experimentar stress o molestias hablando sobre esos temas, puede elegir no contestar las preguntas, o tomarse un descanso, o finalizar la entrevista.

### **ALTERNATIVAS A PARTICIPAR EN ESTE ESTUDIO**

Si no participa en el estudio, usted continuará con su tratamiento actual para la diabetes y control de azúcar en la sangre. Lo alentamos a discutir sus opciones con el personal del estudio, su médico de atención primaria u otro profesional de la salud que esté familiarizado con la diabetes tipo 2. Hay otras clases educativas disponibles en Sea Mar y otros centros de salud para el control/educación de la diabetes. Sin embargo, actualmente el CGM no es pagado por el seguro en pacientes con diabetes tipo 2 que toman menos de 3-4 inyecciones de insulina al día. Si desea usar un dispositivo CGM fuera del estudio, su proveedor de atención primaria podría recetarlos, pero tendría que pagar el costo total del CGM de su bolsillo (cada sensor cuesta \$35-70 según el tipo de dispositivo CGM que esté usando).

### **BENEFICIOS DEL ESTUDIO**

Puede haber un posible beneficio médico para usted si decide participar en el estudio, pero no es una garantía. Es posible que no reciba ningún beneficio directo por participar en el estudio. Las personas que participen en este estudio de investigación agregarán nuevos conocimientos que pueden ayudar a otras personas con diabetes tipo 2.

### **CONFIDENCIALIDAD DE LA INFORMACIÓN DE LA INVESTIGACIÓN**

Toda la información que proporcione será confidencial. Sin embargo, si nos enteramos de que tiene la intención de lastimarse a sí mismo o a otros, debemos informarlo a las autoridades.

El personal del gobierno o de la universidad a veces revisa estudios como este para asegurarse de que se realicen de manera segura y legal. Si se lleva a cabo una revisión de este estudio, es posible que se examinen sus registros. Los revisores protegerán su privacidad. Los registros del estudio no se usarán para ponerlo en riesgo legal de sufrir daños.

### **OTRA INFORMACIÓN**

#### **¿QUÉ SUCEDE SI QUIERO RETIRARME DEL ESTUDIO O SE ME PIDE RETIRARME DEL ESTUDIO?**

Puede negarse a participar y puede retirarse de este estudio en cualquier momento sin penalización ni pérdida de los beneficios a los que tiene derecho. Puede continuar recibiendo

atención médica no relacionada con este estudio. Le animamos a que hable con un miembro del grupo de investigación, para que ellos sepan por qué está interrumpiendo el estudio. Su decisión no generará ninguna penalización ni pérdida de atención médica. Puede continuar recibiendo atención médica no relacionada con este estudio. También podemos pedirle que participe en la junta asesora o que haga una entrevista de salida para que podamos aprender cómo mejorar el programa.

Si está embarazada, la retiraremos del estudio y no recopilaremos más datos. Le pediríamos que busque atención de su proveedor de atención primaria.

### **Devolviéndole los resultados**

Recibirá los resultados de las pruebas de laboratorio (A1c). También podrá ver su nivel de azúcar en la sangre en tiempo real si está en el grupo RT-CGM. Si no está en el grupo RT-CGM, los educadores de salud de Seamar recibirán sus valores de azúcar en sangre al final del estudio y es posible que pueda revisar los resultados con su médico. Si dice en el cuestionario inicial que tiene algún pensamiento acerca de hacerse daño, lo llamaremos de inmediato y lo ayudaremos a obtener ayuda.

### **¿HAY COSTOS RELACIONADOS CON LA PARTICIPACIÓN EN EL ESTUDIO?**

El estudio pagará solo por las pruebas relacionadas con el estudio. Los costos del tratamiento, visitas al consultorio y pruebas para su diabetes y otras condiciones médicas serán responsabilidad suya o de su compañía de seguros. Esto se considera un cuidado estándar.

El estudio pagará los costos de todos los suministros y procedimientos de investigación que tendrá específicamente para el estudio. Estos incluirán los materiales educativos y el sistema de CGM, sensores, y un podómetro si es necesario. Ocasionalmente, puede ver un mayor uso de datos o una pérdida más rápida de batería en su teléfono inteligente con el uso de la aplicación CGM (Clarity). Si esto sucede, notifique al equipo de investigación para que podamos ayudarlo con este problema.

### **Compensación**

Si participa en el estudio, recibirá una tarjeta de regalo de \$50 por cada visita de colección de datos, por un total de \$150 si completa las tres visitas de colección de datos. Si se requieren visitas adicionales no programadas, puede recibir hasta \$50 adicionales.

El miembro de su hogar también recibirá una tarjeta de regalo de \$15 por completar la encuesta/cuestionario. Si se le pide que forme parte de una junta asesora para mejorar el programa de educación y la telemedicina, usted y el miembro de su hogar también recibirán una tarjeta de regalo de \$50 por cada hora que pasen en la junta asesora (probablemente \$100 por cada reunión o \$200 dólares en total). Usted recibirá \$50 por cada hora en la que usted participe en entrevistas de 1:1.

Como incentivo adicional por asistir a las sesiones educativas, se entregara una tarjeta de regalo por \$25 por asistir a 4 sesiones educativas o más, Se entregara otra tarjeta de regalo por \$25 por asistir a 8 sesiones educativas o más.

**¿A quién puedo llamar si tengo preguntas, quejas o si estoy preocupado(a) por de mis derechos como participante?**

Si cree que tiene un problema médico o una enfermedad relacionada con esta investigación, comuníquese de inmediato con la Dra. Nicole Ehrhardt o con otro miembro del equipo de investigación al número que se proporciona en este documento. Ella lo tratará o lo referirá para que reciba tratamiento.

Si tiene alguna pregunta sobre sus derechos como sujeto de investigación u otras preguntas, preocupaciones o quejas sobre la investigación o su participación en este estudio, debe comunicarse con la División de Sujetos Humanos de la UW al (206) 543-0098 o llamar por cobrar al (206) 221-5940.

**Uso de datos y muestras**

La información y/o las muestras que obtengamos de usted para este estudio podrían utilizarse para estudios futuros. Podemos eliminar cualquier cosa que pueda identificarlo de la información y las muestras. Si lo hacemos, esa información y muestras pueden usarse para futuros estudios de investigación o entregarse a otro investigador sin obtener un permiso adicional de su parte. También es posible que en el futuro queramos usar o compartir información del estudio que pueda identificarlo. Si lo hacemos, una junta de revisión decidirá si necesitamos o no obtener un permiso adicional de su parte.

**Fuente de Financiamiento**

Este estudio de investigación cuenta con el apoyo de una subvención de la Asociación Estadounidense de Diabetes. Además, Dexcom (el fabricante del dispositivo CGM que se utiliza en el estudio) ha proporcionado suministros de CGM a un costo reducido para el equipo del estudio.

**Declaración del sujeto:**

He leído este formulario de consentimiento y se me ha explicado el estudio de investigación. Mis preguntas han sido contestadas a mi satisfacción. Entiendo que al firmar este formulario, no he renunciado a mis derechos legales ni liberado a nadie de negligencia. Elegí ser voluntario para el estudio. He recibido una copia de este formulario.

No firme este formulario de consentimiento a menos que haya tenido la oportunidad de hacer preguntas y haya obtenido respuestas satisfactorias.

Si accede a participar en este estudio, recibirá una copia firmada y fechada de este formulario de consentimiento para sus registros.

**Declaración de consentimiento del presentador**

Le he proporcionado a este participante información sobre este estudio. Al participante se le ha dado suficiente tiempo para considerar su participación y he respondido a todas las preguntas que tenían. El participante indicaron que comprenden la naturaleza del estudio, incluyendo los riesgos y beneficios de participar.

---

|                                                                      |       |
|----------------------------------------------------------------------|-------|
| Nombre impreso del personal del estudio que obtuvo el consentimiento | Fecha |
|----------------------------------------------------------------------|-------|

---

|                           |                  |       |
|---------------------------|------------------|-------|
| Nombre impreso del sujeto | Firma del sujeto | Fecha |
|---------------------------|------------------|-------|

Copias a:    Investigador  
                  Sujeto  
                  Expediente médico del sujeto (si corresponde)
